# Supplementary material
Source: PubMed Central journal article supplement (PMC6065097)
Supplement: ASN.2018030228SupplementaryData1.pdf [file ASN.2018030228SupplementaryData1.pdf]

# Supplemental Appendix

## Contents

|         |                                                                                      |
|---------|--------------------------------------------------------------------------------------|
| sTable1 | Prediction by the Human Splicing Finder                                              |
| sTable2 | Clinical and genetic findings of patients analyzed by genotype-phenotype correlation |
| sTable3 | Immunohistochemical analyses                                                         |
| sTable4 | $\alpha$ 5 chain of Type IV collagen expression in male cases                        |
| sFig.1  | In vitro splicing assay (A422)                                                       |
| sFig.2  | Transcript analysis results (Larger view)                                            |

**sTable 1. Prediction by the Human Splicing Finder.**

| Family number | Result       | Mutation          | Transcription                     | CV of original site (WT) | CV of original site (Mutant) | HSF prediction                         | CV of cryptic site (WT) | CV of cryptic site (Mutant) | Patient's site                          | CV of patient's site (WT) | CV of patient's site (Mutant) |
|---------------|--------------|-------------------|-----------------------------------|--------------------------|------------------------------|----------------------------------------|-------------------------|-----------------------------|-----------------------------------------|---------------------------|-------------------------------|
| A7            | -            | c.610-2A>T        | 19bp deletion                     | 88.39                    | 59.44                        | -                                      | -                       | -                           | 19bp down stream from the original site | 87.63                     | 87.63                         |
| A8            | Compatible   | c.3247-2A>C       | 127bp deletion (Exon 37 skipping) | 90.2                     | 61.26                        | -                                      | -                       | -                           | -                                       | -                         | -                             |
| A17           | Compatible   | c.3455-1G>A       | 1bp deletion                      | 81.72                    | 52.77                        | 1bp downstream from the original site  | 46.06                   | 75.11                       | 1bp downstream from the original site   | 46.06                     | 75.11                         |
| A19           | Compatible   | c.1948+894C>G     | 106bp insersion with stop codon   | -                        | -                            | c.1948+893 (donor)                     | 60.6                    | 89.55                       | c.1948+893 (donor)                      | 60.6                      | 89.55                         |
| A21           | Incompatible | c.3790G>A         | 186bp deletion (Exon 41 skipping) | 91.2                     | 80.62                        | -                                      | -                       | -                           | -                                       | -                         | -                             |
| A27           | Compatible   | c.991-1G>A        | 1bp deletion                      | 83.19                    | 54.24                        | 1bp down stream from the original site | 42.41                   | 71.36                       | 1bp down stream from the original site  | 42.41                     | 71.36                         |
| A28           | -            | c.2147-2A>G       | 18bp deletion                     | 89.64                    | 60.7                         | 18bp downstream from the original site | 85.97                   | 85.97                       | 18bp downstream from the original site  | 85.97                     | 85.97                         |
| A30           | Compatible   | c.990+1G>T        | 54bp deletion (Exon 17 skipping)  | 96.71                    | 69.88                        | -                                      | -                       | -                           | -                                       | -                         | -                             |
| A43           | -            | c.1948+1G>A       | 169bp delesion (Exon 25 skipping) | 100                      | 73.16                        | -                                      | -                       | -                           | -                                       | -                         | -                             |
| A48           | Compatible   | c.4511-345A>G     | 74bp insersion with stop codon    | -                        | -                            | c.4511-345 (donor)                     | 64.1                    | 90.93                       | c.4511-345 (donor)                      | 64.1                      | 90.93                         |
| A91           | Compatible   | c.646-2A>G        | 42bp deletion (Exon 12 skipping)  | 98.28                    | 69.33                        | -                                      | -                       | -                           | -                                       | -                         | -                             |
| A97           | -            | c.1166-1G>A       | 174bp deletion (Exon 20 skipping) | 81.24                    | 52.29                        | 1bp down stream from the original site | 51.09                   | 80.03                       | -                                       | -                         | -                             |
| A116          | Compatible   | c.646-1G>C        | 42bp deletion (Exon 12 skipping)  | 98.28                    | 69.33                        | -                                      | -                       | -                           | -                                       | -                         | -                             |
| A121          | -            | c.546+2_3 insT    | 81bp deletion (Exon 9 skipping)   | 89.42                    | 70.3                         | 1bp down stream from the original site | 22.38                   | 72.21                       | -                                       | -                         | -                             |
| A126          | Compatible   | c.609+875G>T      | 123bp insersion with stop codon   | -                        | -                            | c.609+874 (donor)                      | 64.21                   | 91.05                       | c.609+874 (donor)                       | 64.21                     | 91.05                         |
| A128          | Incompatible | c.2042-18A>G      | 105bp deletion (Exon 27 skipping) | 87.29                    | 87.29                        | 15bp up stream from the original site  | 51.52                   | 80.46                       | -                                       | -                         | -                             |
| A141          | Compatible   | c.3247-2A>G       | 127bp deletion (Exon 37 skipping) | 90.2                     | 61.26                        | -                                      | -                       | -                           | -                                       | -                         | -                             |
| A158          | -            | c.2245-8T>A       | 6bp insertion                     | 79.9                     | 77.91                        | 6bp upstream from the original site    | 42.25                   | 71.19                       | 6bp upstream from the original site     | 42.25                     | 71.19                         |
| A178          | -            | c.876A>T          | 35bp deletion                     | 83.61                    | 83.61                        | 17bp up stream from the original site  | 68.88                   | 95.71                       | C. 857                                  | 95.55                     | 95.55                         |
| A196          | Compatible   | c.1588-1G>A       | 1bp deletion                      | 90.89                    | 61.95                        | 1bp down stream from the original site | 50.76                   | 79.71                       | 1bp down stream from the original site  | 50.76                     | 79.71                         |
| A217          | Compatible   | c.4510+1754T>G    | 84bp insertion with stop codon    | -                        | -                            | c.4510+1750 (donor)                    | 76.8                    | 89.1                        | c.4510+1750 (donor)                     | 76.8                      | 89.1                          |
| A231          | -            | c.3107-4A>G       | 3bp insertion                     | 90.34                    | 90.27                        | 3bp up stream from the original site   | 53.4                    | 82.34                       | 3bp up stream from the original site    | 53.4                      | 82.34                         |
| A244          | Compatible   | c.4069+1G>A       | 72bp deletion (Exon 44 skipping)  | 89.32                    | 62.49                        | -                                      | -                       | -                           | -                                       | -                         | -                             |
| A247          | -            | c.687+5G>A        | 42bp deletion (Exon 12 skipping)  | 87.31                    | 75.14                        | -                                      | -                       | -                           | -                                       | -                         | -                             |
| A258          | -            | c.3107-4A>G       | 3bp insertion                     | 90.34                    | 90.27                        | 3bp up stream from the original site   | 53.4                    | 82.34                       | 3bp up stream from the original site    | 53.4                      | 82.34                         |
| A276          | Compatible   | c.892-2A>G        | 45bp deletion (Exon 16 skipping)  | 83.68                    | 54.73                        | -                                      | -                       | -                           | -                                       | -                         | -                             |
| A298          | -            | c.3107-4A>G       | 3bp insertion                     | 90.34                    | 90.27                        | 3bp up stream from the original site   | 53.4                    | 82.34                       | 3bp up stream from the original site    | 53.4                      | 82.34                         |
| A299          | -            | c.2395+3A>G       | 151bp delesion (Exon 29 skipping) | 88.31                    | 87.15                        | -                                      | -                       | -                           | -                                       | -                         | -                             |
| A302          | -            | c.1948+1G>A       | 169bp delesion (Exon 25 skipping) | 100                      | 73.16                        | -                                      | -                       | -                           | -                                       | -                         | -                             |
| A323          | -            | c.3605-9C>G       | 8bp insertion                     | 83.96                    | 82.05                        | 8bp upstream from the original site    | 48.66                   | 77.61                       | 8bp upstream from the original site     | 48.66                     | 77.61                         |
| A326          | -            | c.2678-1G>A       | 90bp delesion (Exon 32 skipping)  | 84.18                    | 55.23                        | 1bp down stream from the original site | 46.92                   | 75.87                       | -                                       | -                         | -                             |
| A329          | Compatible   | c.1424-367C>T     | 93bp insersion                    | -                        | -                            | c.1424-368 (donor)                     | 81.7                    | 84.5                        | c.1424-368 (donor)                      | 81.7                      | 84.5                          |
| A333          | Incompatible | c.4803+1G>A       | 345bp insersion                   | 91.34                    | 64.5                         | -                                      | -                       | -                           | -                                       | -                         | -                             |
| A365          | Compatible   | c.3604+1G>A       | 51bp delesion (Exon 40 skipping)  | 80.91                    | 54.08                        | -                                      | -                       | -                           | -                                       | -                         | -                             |
| A371          | Compatible   | c.1032+3_6 del AA | 42bp delesion (Exon 18 skipping)  | 84.38                    | 58.24                        | -                                      | -                       | -                           | -                                       | -                         | -                             |
| A375          | -            | c.1948G>T         | 169bp delesion (Exon 25 skipping) | 100                      | 89.13                        | -                                      | -                       | -                           | -                                       | -                         | -                             |
| A384          | -            | c.4511-11A>G      | 10bp insertion                    | 80.19                    | 80.44                        | 10bp upstream from the original site   | 67.51                   | 96.45                       | 10bp upstream from the original site    | 67.51                     | 96.45                         |
| A402          | Compatible   | c.2146+4delT      | 105bp delesion (Exon 27 skipping) | 71.45                    | 47.18                        | -                                      | -                       | -                           | -                                       | -                         | -                             |
| A422          | Incompatible | c.548dupG         | 63bp delesion (Exon 10 skipping)  | 86.25                    | 86.25                        | -                                      | -                       | -                           | -                                       | -                         | -                             |
| A424          | Compatible   | c.385-1G>A        | 1bp deletion                      | 83.09                    | 54.15                        | 1bp down stream from the original site | 51.89                   | 80.83                       | 1bp down stream from the original site  | 51.89                     | 80.83                         |
| A452          | Incompatible | c.2395+5G>A       | 151bp deletion (Exon 29 skipping) | 76.46                    | 76.46                        | -                                      | -                       | -                           | -                                       | -                         | -                             |

HSF: human splicing finder, CV: consensus value, WT: wild-type

**sTable 2. Clinical and genetic findings of patients analyzed by genotype-phenotype correlation.**

| Family number                       | Effect         | ESRD Age (yr) | Mutation      | Intron/Exon | Transcription  |
|-------------------------------------|----------------|---------------|---------------|-------------|----------------|
| Splice consensus sequence mutations |                |               |               |             |                |
| A7*                                 | Truncating     | 9             | c.610-2A>T    | Intron 10   | 19bp deletion  |
| A8*                                 | Truncating     | 16            | c.3247-2A>C   | Intron 36   | 127bp deletion |
| A8-1                                | Truncating     | 14            | c.3247-2A>C   | Intron 36   | 127bp deletion |
| A27*                                | Truncating     | no (5yo)      | c.991-1G>A    | Intron 17   | 1bp deletion   |
| A30-1                               | Non-truncating | 34            | c.990+1G>T    | Intron 17   | 54bp deletion  |
| A43*                                | Truncating     | no (2yo)      | c.1948+1G>A   | Intron 25   | 169bp deletion |
| A196*                               | Truncating     | no (7yo)      | c.1588-1G>A   | Intron 23   | 1bp deletion   |
| A244-1                              | Non-truncating | 17            | c.4069+1G>A   | Intron 44   | 72bp deletion  |
| A244-2                              | Non-truncating | 25            | c.4069+1G>A   | Intron 44   | 72bp deletion  |
| A276*                               | Non-truncating | 29            | c.892-2A>G    | Intron 15   | 45bp deletion  |
| A276-1                              | Non-truncating | 36            | c.892-2A>G    | Intron 15   | 45bp deletion  |
| A302-1                              | Truncating     | 20            | c.1948+1G>A   | Intron 25   | 169bp deletion |
| A302-2                              | Truncating     | 23            | c.1948+1G>A   | Intron 25   | 169bp deletion |
| A326*                               | Non-truncating | no (12yo)     | c.2678-1G>A   | Intron 31   | 90bp deletion  |
| A365*                               | Non-truncating | no (3yo)      | c.3604+1G>A   | Intron 40   | 51bp deletion  |
| A424*                               | Truncating     | no (11yo)     | c.385-1G>A    | Intron 6    | 1bp deletion   |
| A424-1                              | Truncating     | 15            | c.385-1G>A    | Intron 6    | 1bp deletion   |
| A424-2                              | Truncating     | no (8yo)      | c.385-1G>A    | Intron 6    | 1bp deletion   |
| A424-3                              | Truncating     | 30            | c.385-1G>A    | Intron 6    | 1bp deletion   |
| Suspected splice site mutations     |                |               |               |             |                |
| A121*                               | Non-truncating | no (25yo)     | c.546+2_3insT | Intron 9    | 81bp deletion  |
| A128*                               | Non-truncating | no (46yo)     | c.2042-18A>G  | Intron 26   | 105bp deletion |
| A128-1                              | Non-truncating | 35            | c.2042-18A>G  | Intron 26   | 105bp deletion |
| A231-1                              | Non-truncating | no (3yo)      | c.3107-4A>G   | Intron 35   | 3bp insertion  |

|                                               |                |           |                    |           |                                 |
|-----------------------------------------------|----------------|-----------|--------------------|-----------|---------------------------------|
| A231-2                                        | Non-truncating | 42        | c.3107-4A>G        | Intron 35 | 3bp insertion                   |
| A231-3                                        | Non-truncating | 42        | c.3107-4A>G        | Intron 35 | 3bp insertion                   |
| A258*                                         | Non-truncating | no (3yo)  | c.3107-4A>G        | Intron 35 | 3bp insertion                   |
| A298*                                         | Non-truncating | 25        | c.3107-4A>G        | Intron 35 | 3bp insertion                   |
| A298-1                                        | Non-truncating | 25        | c.3107-4A>G        | Intron 35 | 3bp insertion                   |
| A298-2                                        | Non-truncating | no (35yo) | c.3107-4A>G        | Intron 35 | 3bp insertion                   |
| A299-1                                        | Truncating     | 21        | c.2395+3A>G        | Intron 29 | 151bp deletion                  |
| A371*                                         | Non-truncating | no (12yo) | c.1032+3_6 delAAGT | Intron 18 | 42bp deletion                   |
| A371-1                                        | Non-truncating | 40        | c.1032+3_6 delAAGT | Intron 18 | 42bp deletion                   |
| A402*                                         | Non-truncating | no (7yo)  | c.2146+4delT       | Intron 27 | 105bp deletion                  |
| <hr/>                                         |                |           |                    |           |                                 |
| Deep intronic mutations creating cryptic exon |                |           |                    |           |                                 |
| <hr/>                                         |                |           |                    |           |                                 |
| A19*                                          | Truncating     | no (22yo) | c.1948+894C>G      | Intron 25 | 106bp insertion with stop codon |
| A48*                                          | Truncating     | no (6yo)  | c.4511-345A>G      | Intron 47 | 74bp insertion with stop codon  |
| A126*                                         | Truncating     | no (12yo) | c.609+875G>T       | Intron 10 | 123bp insertion with stop codon |
| A217*                                         | Truncating     | no (3yo)  | c.4510+1754T>G     | Intron 47 | 84bp insertion with stop codon  |
| A217-1                                        | Truncating     | no (1yo)  | c.4510+1754T>G     | Intron 47 | 84bp insertion with stop codon  |
| A329*                                         | Non-truncating | 22        | c.1424-367C>T      | Intron 21 | 93bp insertion                  |
| <hr/>                                         |                |           |                    |           |                                 |
| Exonic mutations                              |                |           |                    |           |                                 |
| <hr/>                                         |                |           |                    |           |                                 |
| A21*                                          | Non-truncating | 24        | c.3790G>A          | Exon 41   | 186bp deletion                  |
| A21-1                                         | Non-truncating | 20        | c.3790G>A          | Exon 41   | 186bp deletion                  |
| A21-2                                         | Non-truncating | no (10yo) | c.3790G>A          | Exon 41   | 186bp deletion                  |
| A178*                                         | Truncating     | 18        | c.876A>T           | Exon 15   | 35bp deletion                   |
| A178-1                                        | Truncating     | no (21yo) | c.876A>T           | Exon 15   | 35bp deletion                   |
| A375*                                         | Truncating     | 11        | c.1948G>T          | Exon 25   | 169bp deletion                  |
| A422*                                         | Non-truncating | 29        | c.548dupG          | Exon 10   | 63bp deletion                   |

\* shows proband, # shows the specifically reported case

ESRD: end stage renal disease, yo: years old

**sTable3: Immunohistochemical analyses**

| <b>Family number</b>                       | <b>Gender</b> | <b>Effect</b>  | <b><math>\alpha 5(\text{IV})</math></b> |
|--------------------------------------------|---------------|----------------|-----------------------------------------|
| <b>Splice consensus sequence mutations</b> |               |                |                                         |
| A7                                         | Male          | Truncating     | Negative                                |
| A8                                         | Male          | Truncating     | N/A                                     |
| A17                                        | Female        | Truncating     | Positive                                |
| A27                                        | Male          | Truncating     | Negative                                |
| A28                                        | Female        | Non-truncating | Positive                                |
| A30                                        | Female        | Non-truncating | Positive                                |
| A43                                        | Male          | Truncating     | Negative                                |
| A91                                        | Female        | Non-truncating | Positive                                |
| A97                                        | Female        | Non-truncating | Positive                                |
| A116                                       | Female        | Non-truncating | Positive                                |
| A141                                       | Female        | Truncating     | Positive                                |
| A196                                       | Male          | Truncating     | Negative                                |
| A244                                       | Female        | Non-truncating | Positive                                |
| A276                                       | Male          | Non-truncating | N/A                                     |
| A302                                       | Female        | Truncating     | N/A                                     |
| A326                                       | Male          | Non-truncating | Negative                                |
| A333                                       | Male          | Truncating     | N/A                                     |
| A365                                       | Male          | Non-truncating | Negative                                |
| A424                                       | Male          | Truncating     | Negative                                |
| <b>Suspected splice site mutations</b>     |               |                |                                         |
| A121                                       | Male          | Non-truncating | Positive                                |
| A128                                       | Male          | Non-truncating | Negative (skin)                         |
| A158                                       | Female        | Non-truncating | N/A                                     |
| A231                                       | Female        | Non-truncating | Positive                                |
| A247                                       | Female        | Non-truncating | Positive                                |
| A258                                       | Male          | Non-truncating | N/A                                     |

|      |        |                |          |
|------|--------|----------------|----------|
| A298 | Male   | Non-truncating | Positive |
| A299 | Female | Truncating     | Positive |
| A323 | Female | Non-truncating | Positive |
| A371 | Male   | Non-truncating | N/A      |
| A384 | Female | Truncating     | Positive |
| A402 | Male   | Non-truncating | N/A      |
| A452 | Female | Truncating     | Positive |

**Deep intronic mutations creating cryptic exon**

|      |      |                |                 |
|------|------|----------------|-----------------|
| A19  | Male | Truncating     | Negative        |
| A48  | Male | Truncating     | Negative (skin) |
| A126 | Male | Truncating     | Negative        |
| A217 | Male | Truncating     | Negative        |
| A329 | Male | Non-truncating | Negative        |

**Exonic mutations**

|      |      |                |          |
|------|------|----------------|----------|
| A21  | Male | Non-truncating | N/A      |
| A178 | Male | Truncating     | Negative |
| A375 | Male | Truncating     | N/A      |
| A422 | Male | Non-truncating | Positive |

---

N/A: not available,  $\alpha 5(\text{IV})$ :  $\alpha 5$  chain of type IV collagen

**sTable4: $\alpha$ 5 chain of Type IV collagen expression in male cases**

|                       | <b>Positive</b> | <b>Negative</b> |
|-----------------------|-----------------|-----------------|
| <b>Truncating</b>     | 0               | 10              |
| <b>Non-truncating</b> | 3               | 4               |

sFig.1a

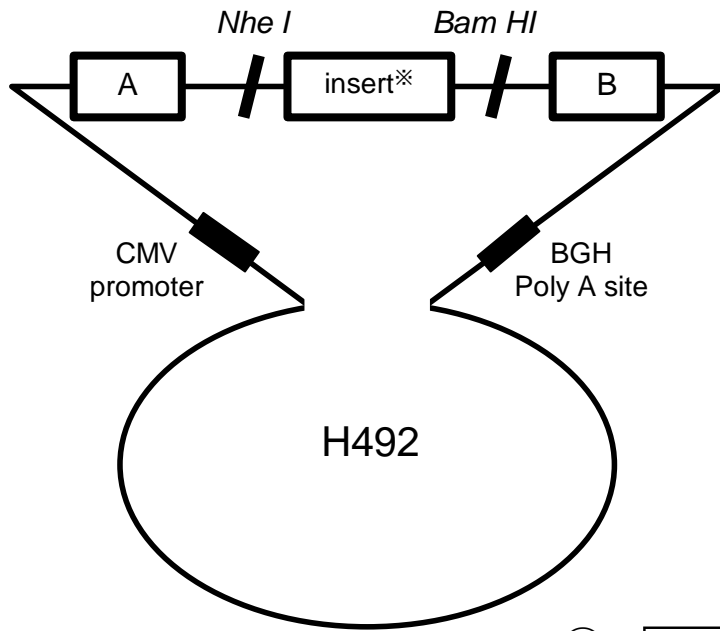

sFig.1b

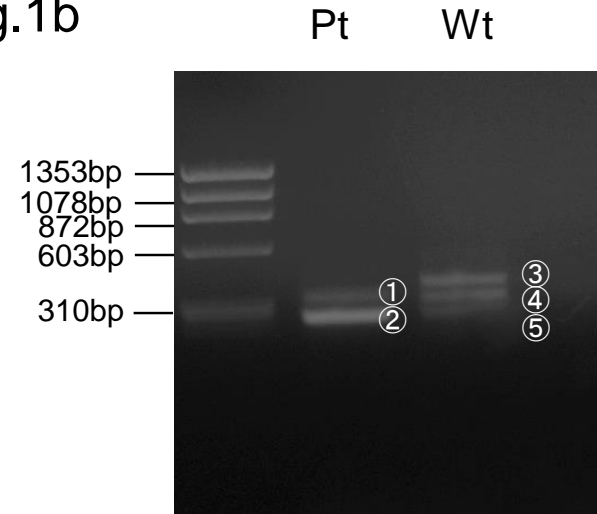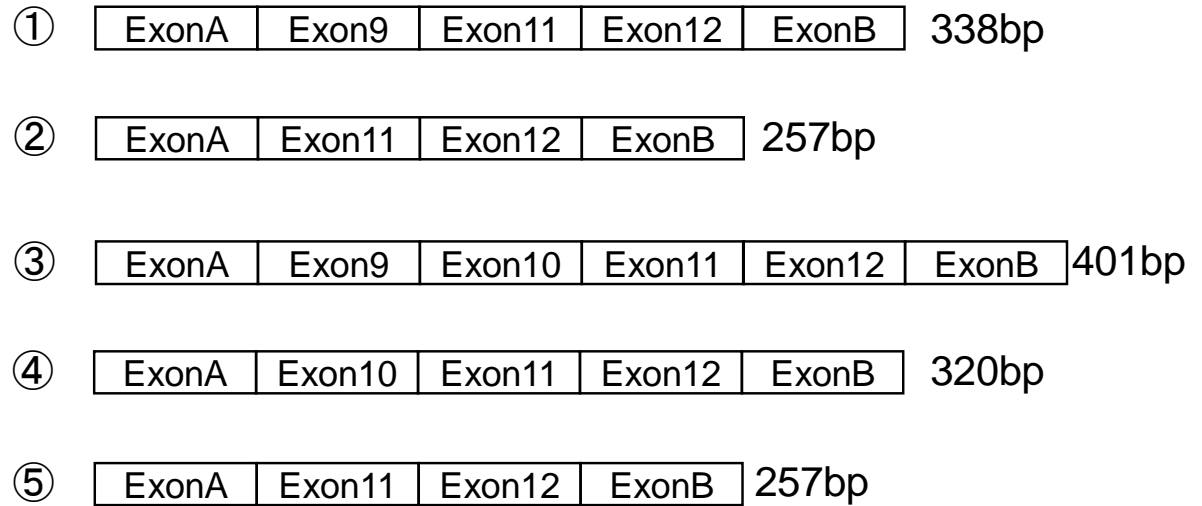



# sFig.1c

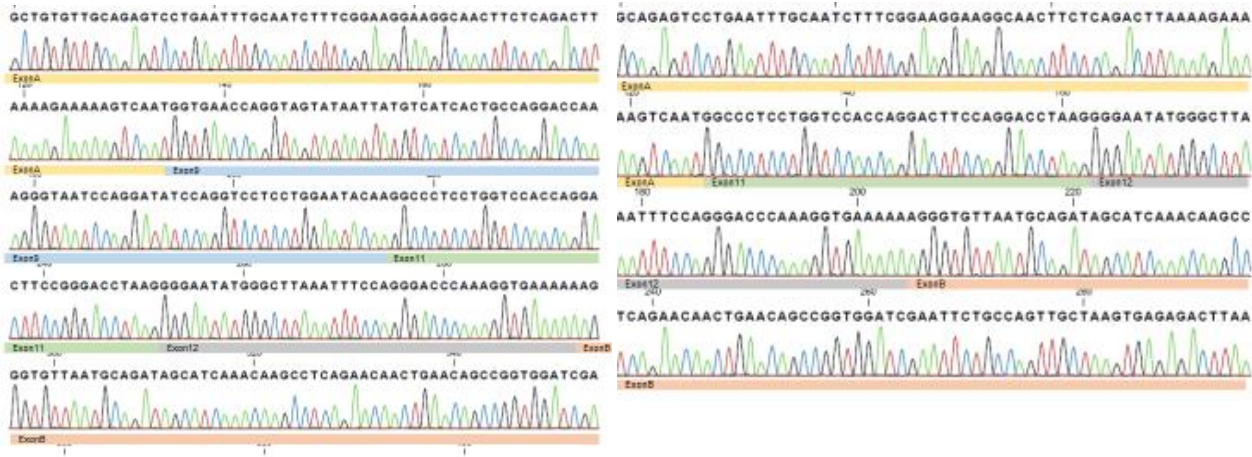

Pt①: Exon10 skipping

Pt②: Exon9+Exon10 skipping

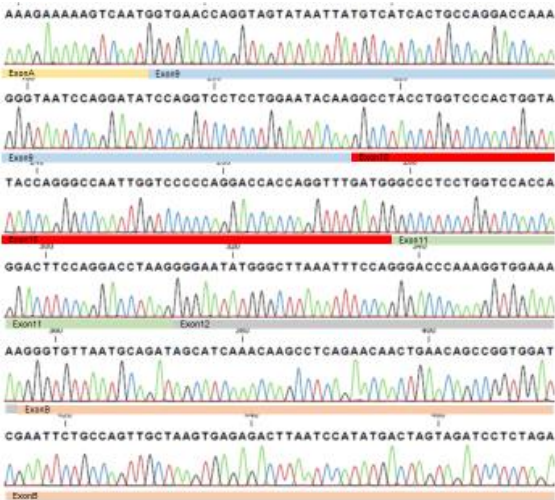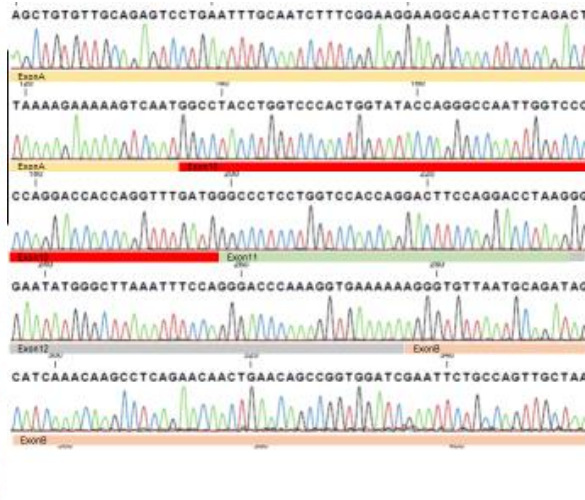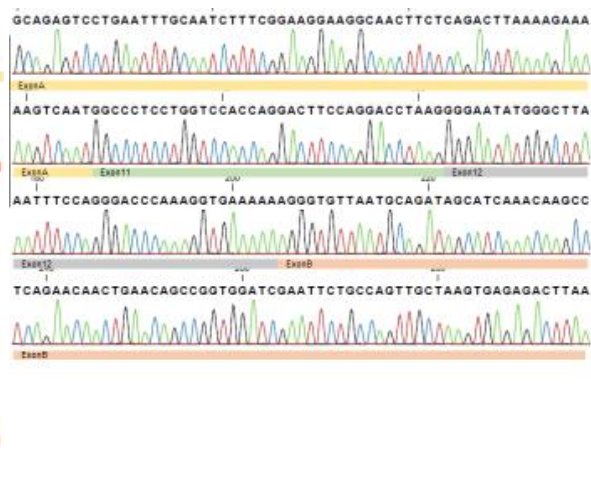

Wt③: full

Wt④: Exon9 skipping

Wt⑤: Exon9+Exon10 skipping

# A

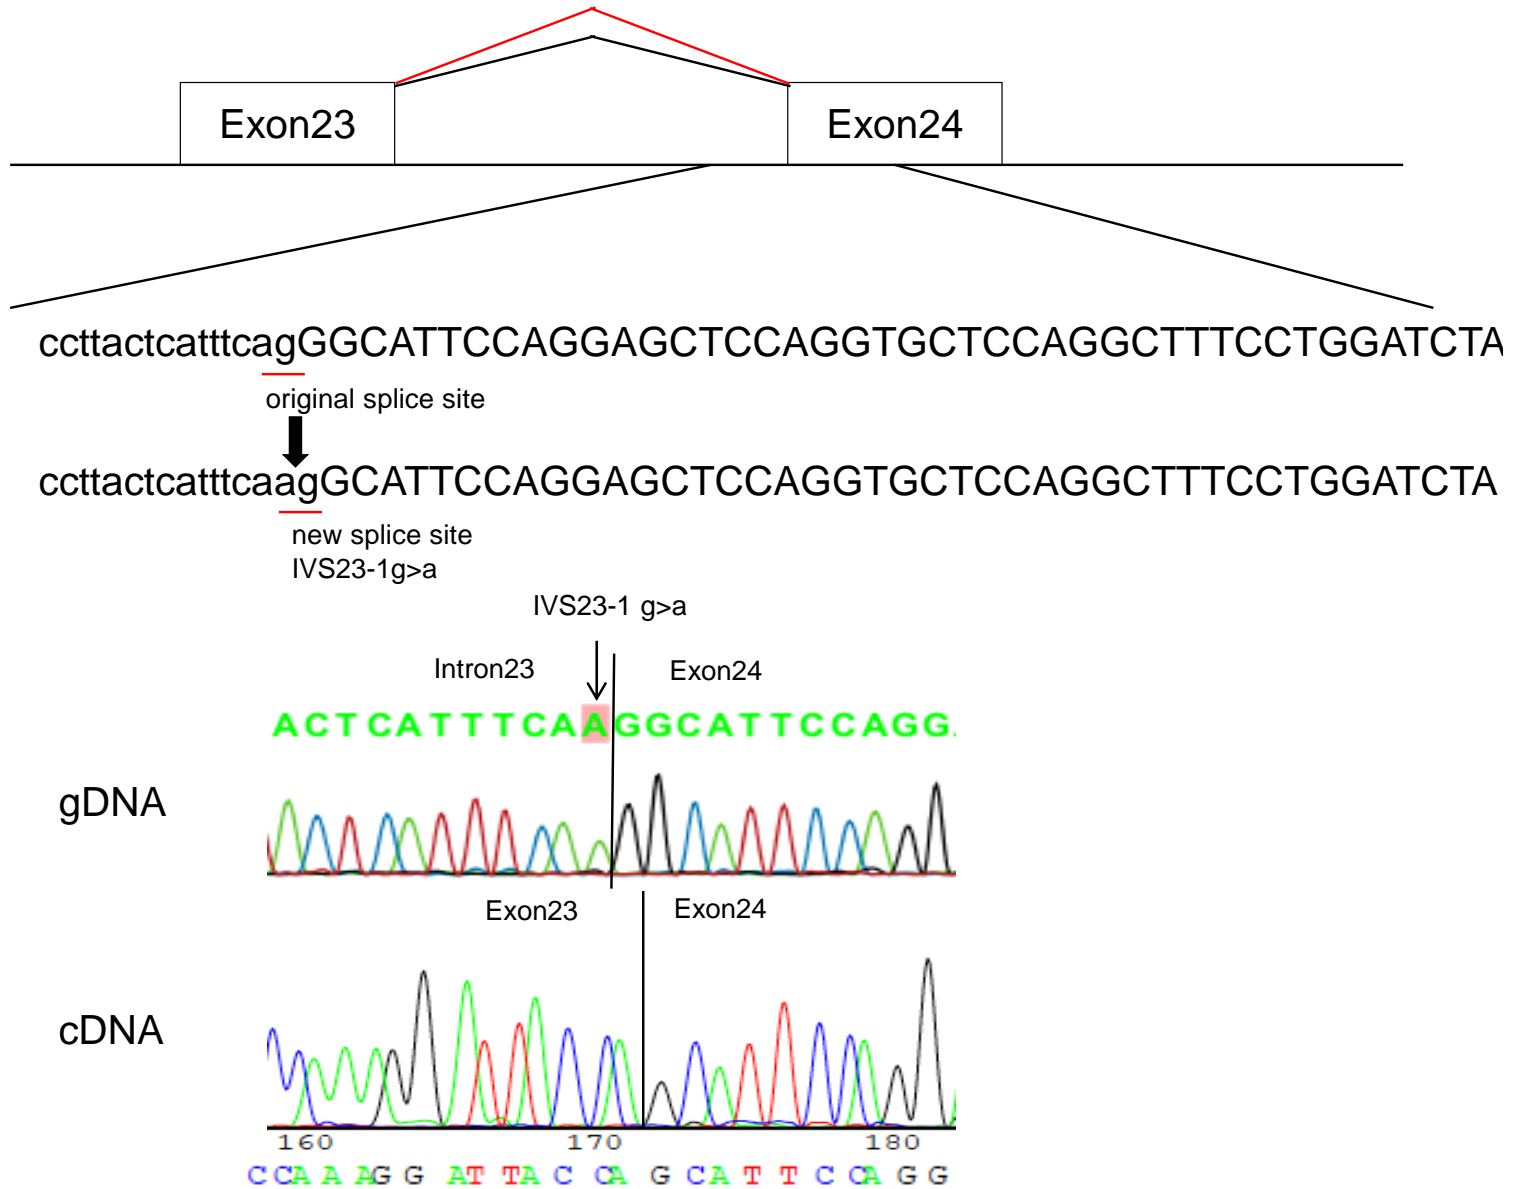

# B

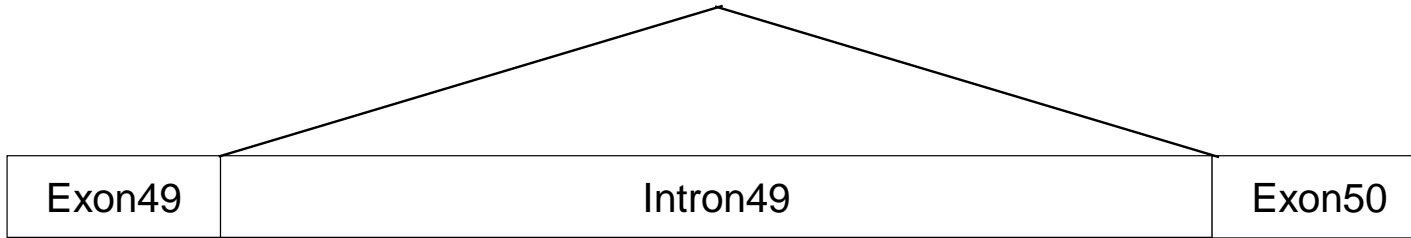

Normal: GTTATTCCTTCATGATGgtat t t t a c a c t c t t  
original splice site

↓  
Patient: GTTATTCCTTCATGATGATATTTTACACTCTT  
IVS49+1 g>a

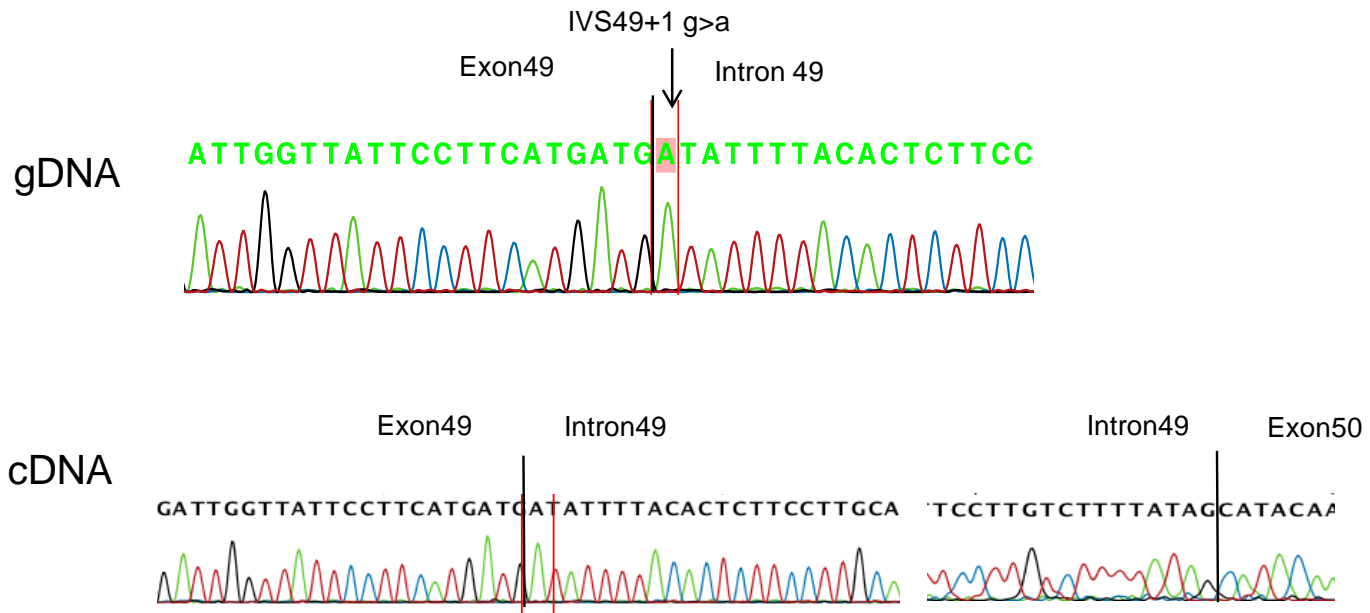

# C

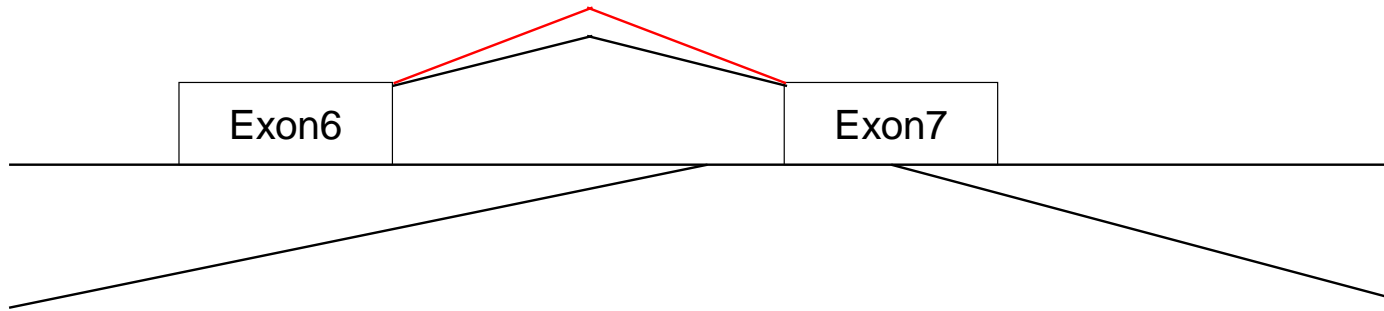

Normal: ttaactccttctagGGGAGAACGTGGATTTCAGGCAGTCCCGGTTTTCTGGTTTACAG

original splice site

Patient: ttaactccttctaagGAGAACGTGGATTTCAGGCAGTCCCGGTTTTCTGGTTTACAG

new splice site  
IVS6-1 g>a

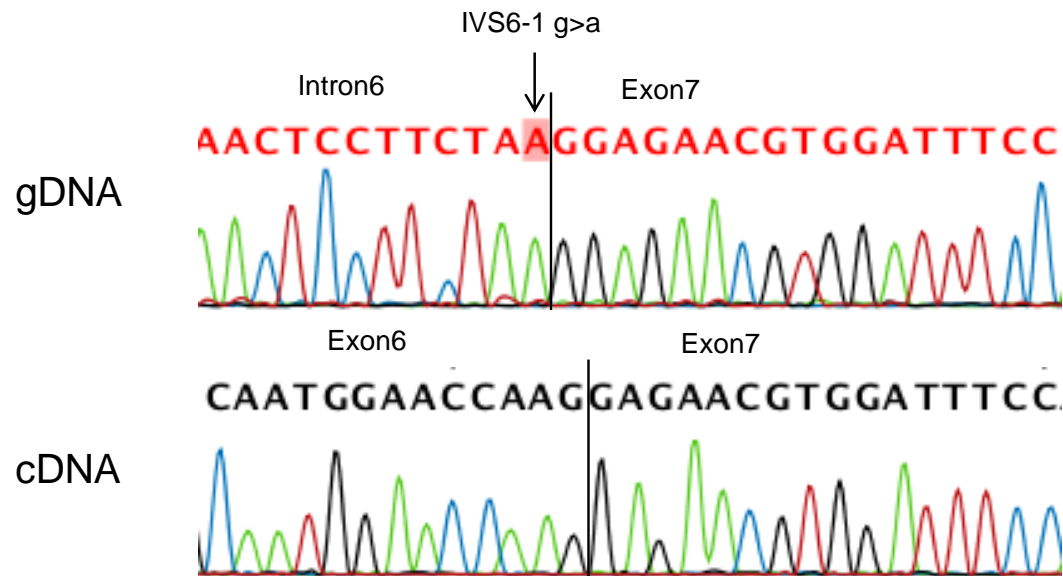

D

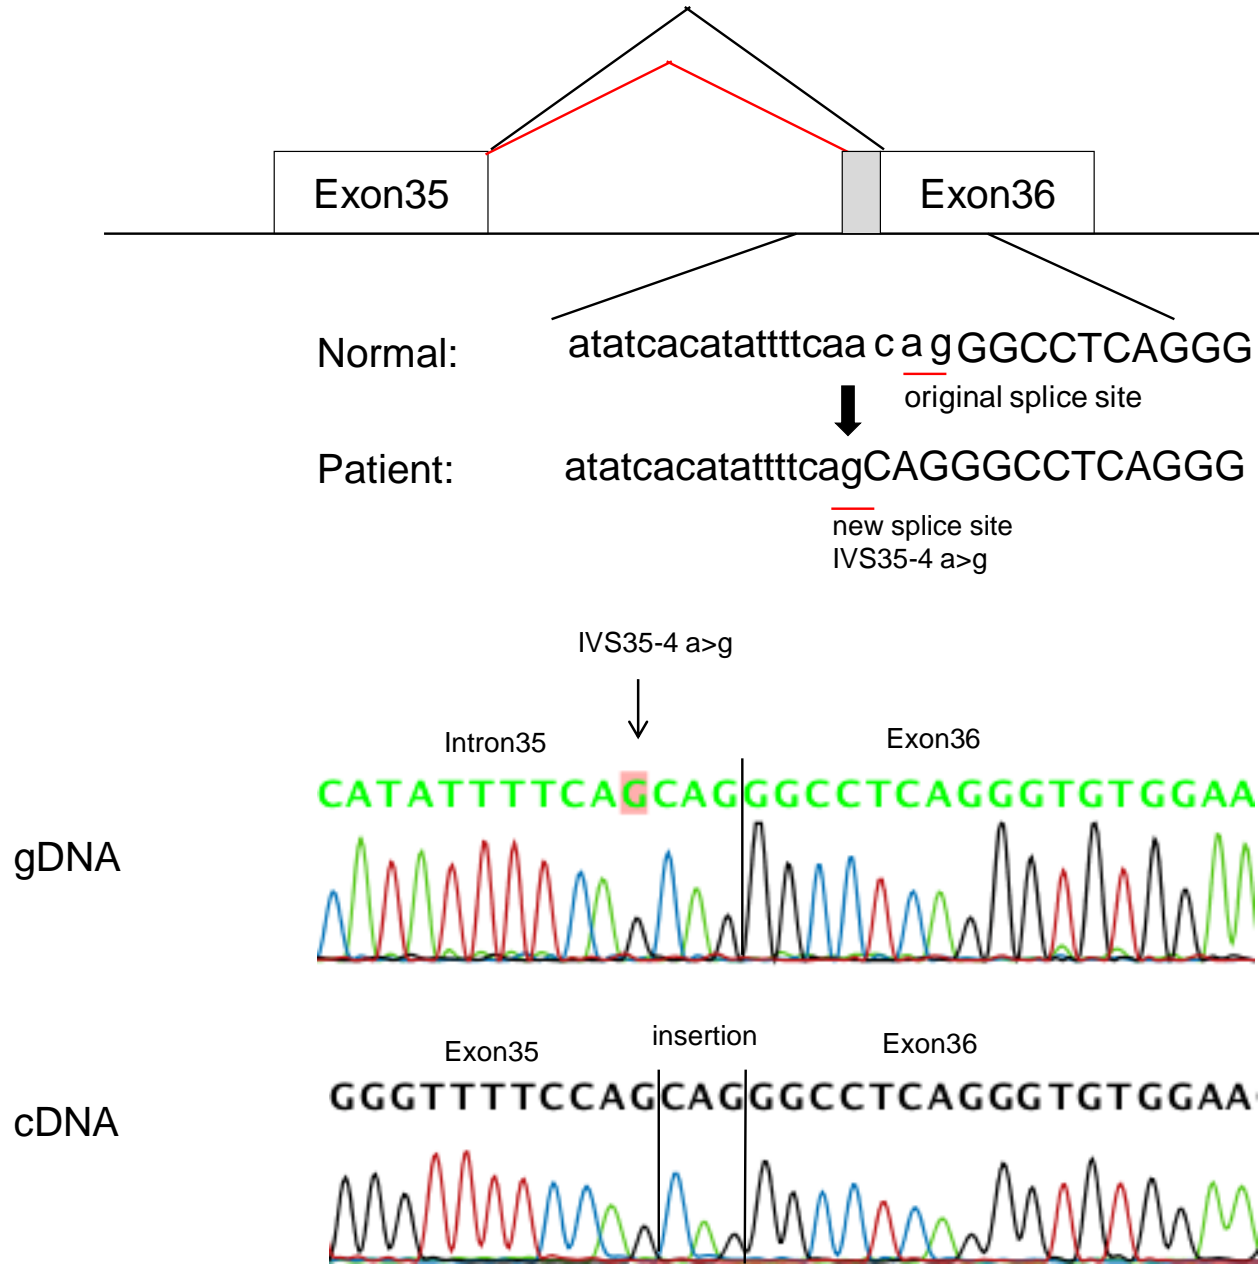

# E

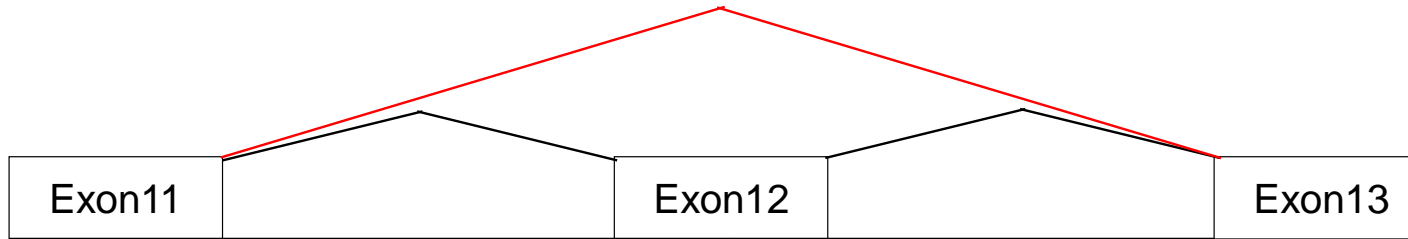

Normal: AGGGACCCAAAGGTGAAAAgtgagtaaagaaagaga

original splice site

Patient: agggacccaaagggtgaaaaagtgaataaagaaagaga

IVS12+5 g>a

gDNA

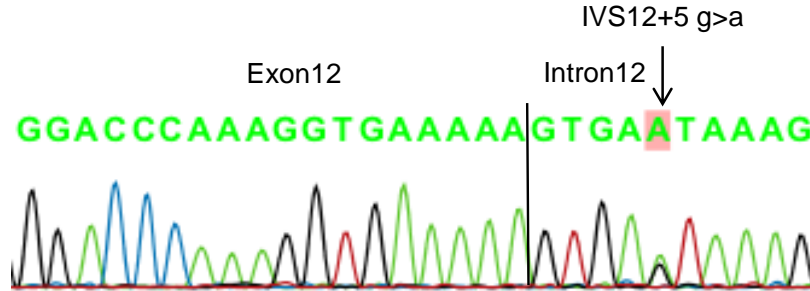

cDNA

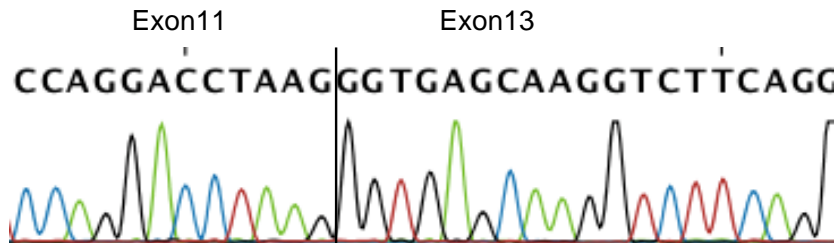

F

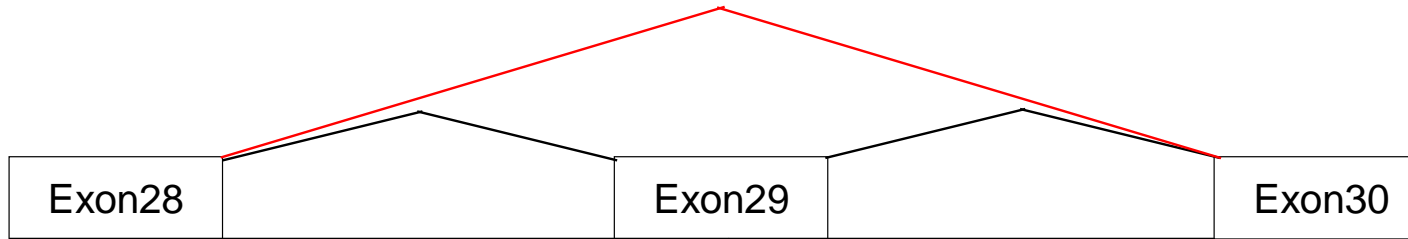

Normal: GGGCTCCCTGGACCAAAGgtatggaggctgtcactg  
original splice site

Patient: g g g c t c c c t g g a c c a a a g g t g t g g a g g c t g t c a c t g  
IVS29+3 a>g

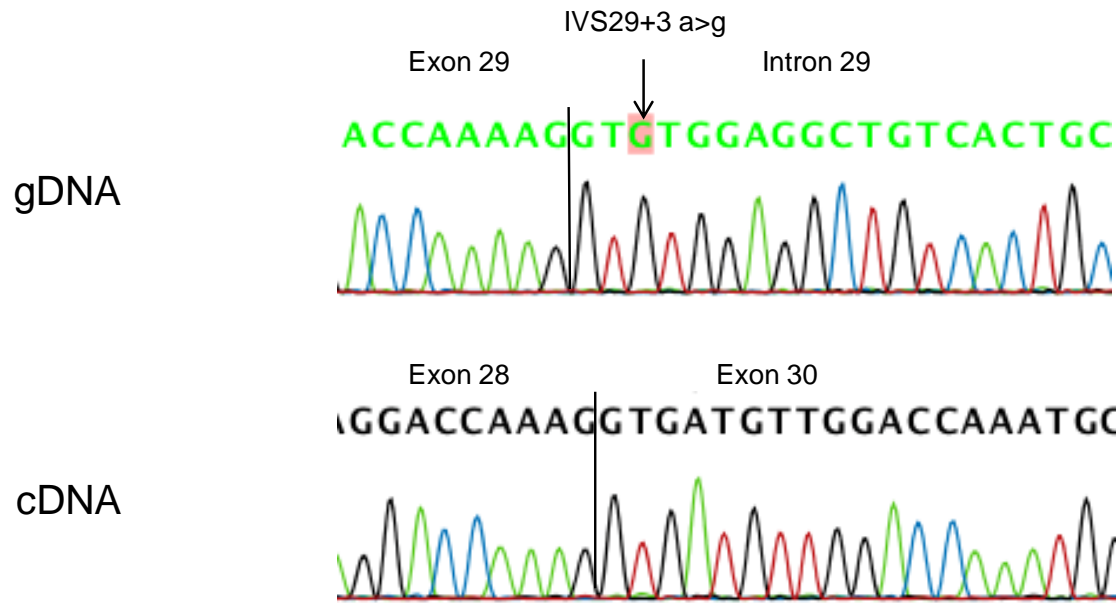

# G

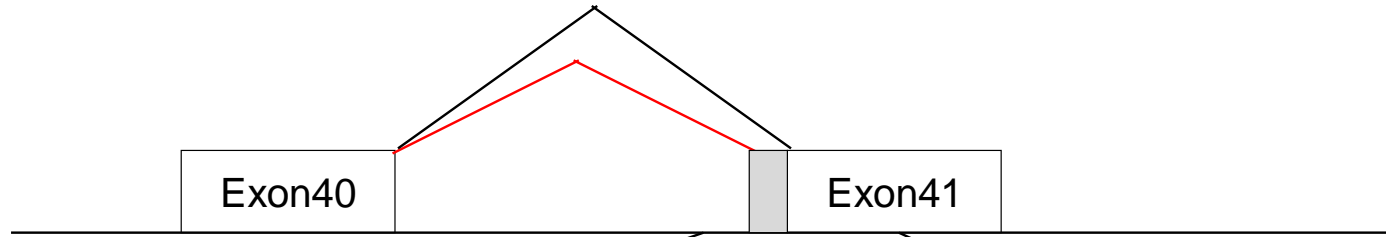

Normal: tatacttta c t t t c a t a g GCCAAAAGGGT  
original splice site

Patient: tatacttta GTTTCATAGG GCCAAAAGGGT  
new splice site  
IVS40-9 c>g

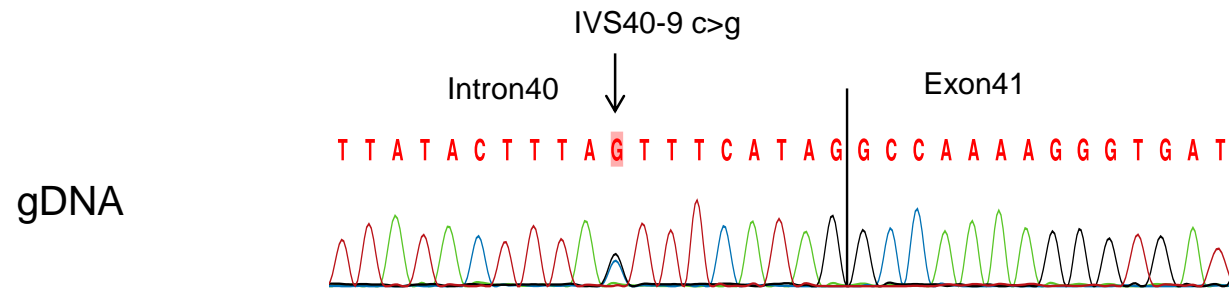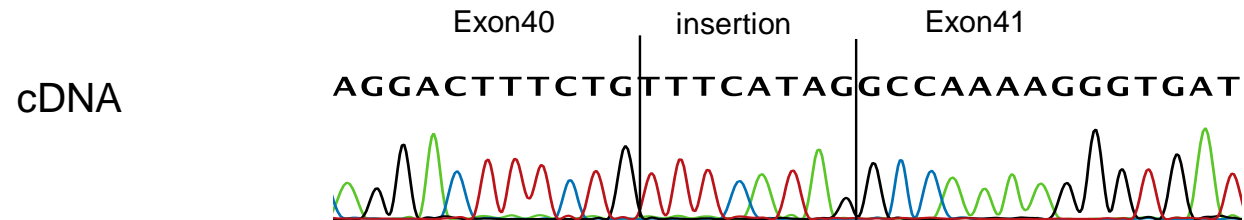



# H

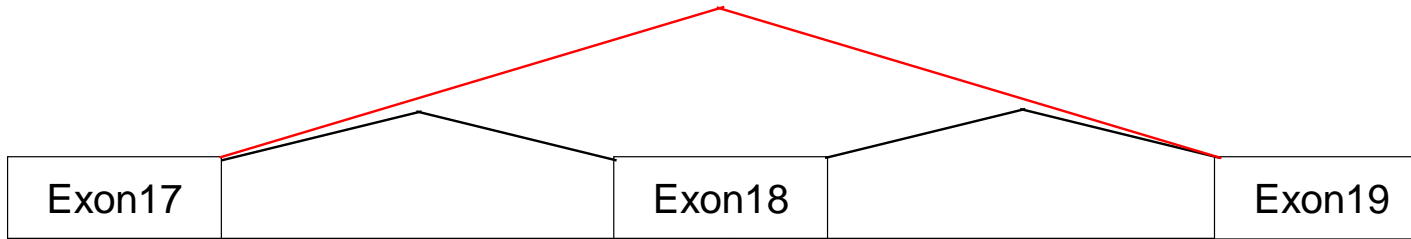

Normal: CACCTGGACCTCCTGGACTTgtaagtttttttttagtc

original splice site

Patient: cacctggacctcctggacttgt ---- ttttttttagtc

IVS18+3\_6 del aagt

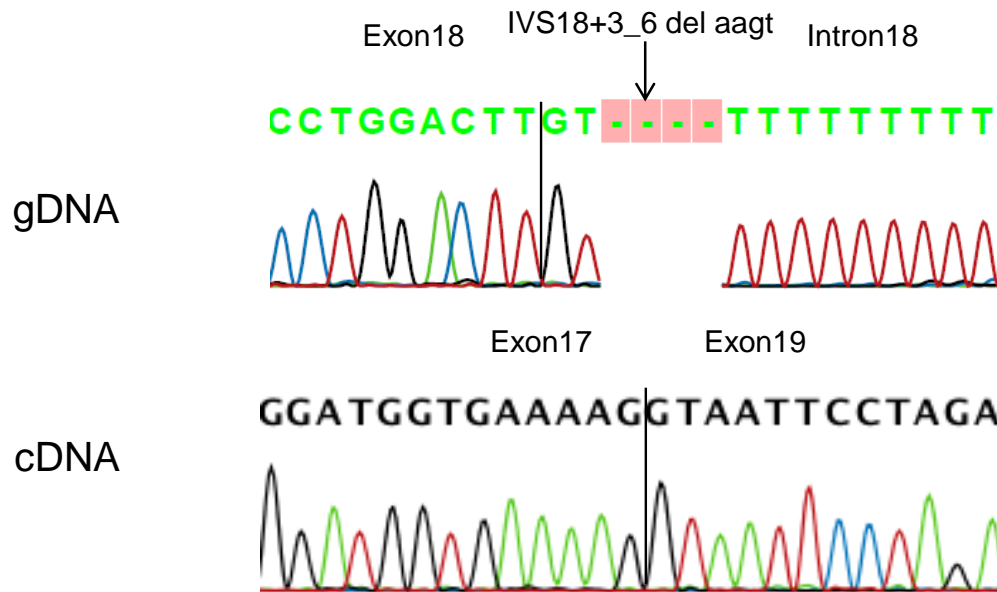

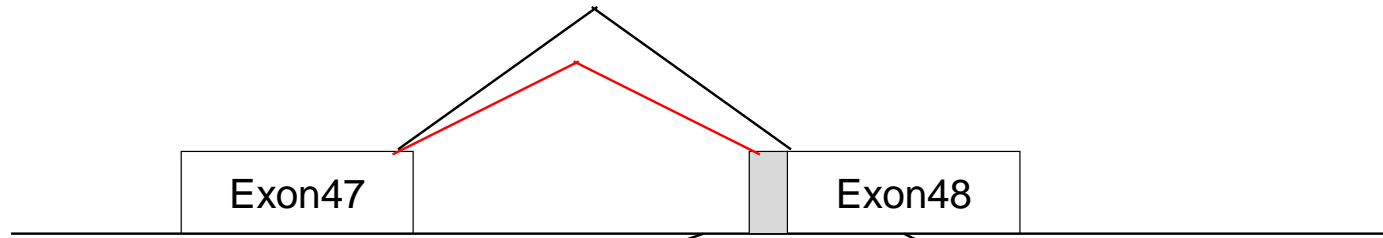

Normal: tttctctccaaa t c t t t c t a gGGACGGCTGGC  
original splice site

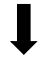

Patient: tttctctccagATCTTTCTAGGGACGGCTGGC  
new splice site  
 IVS47-11 a>g

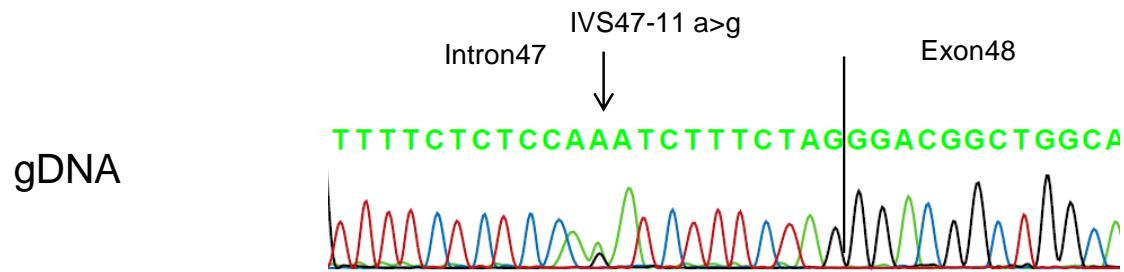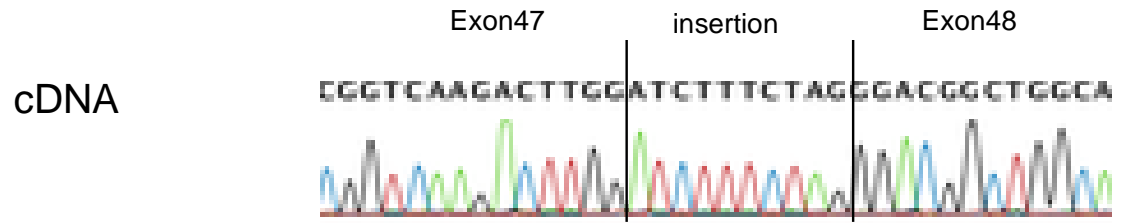

J

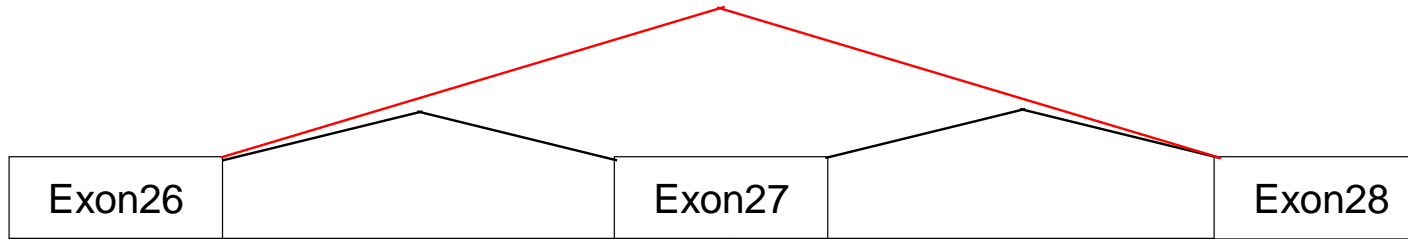

Normal: GGACCACCTGGTCCCAAAGgtatgttgaatgggtagc  
original splice site

Patient: ggaccacctggtcccaaag gta-gttggaatgggtagc  
IVS27+4 del t

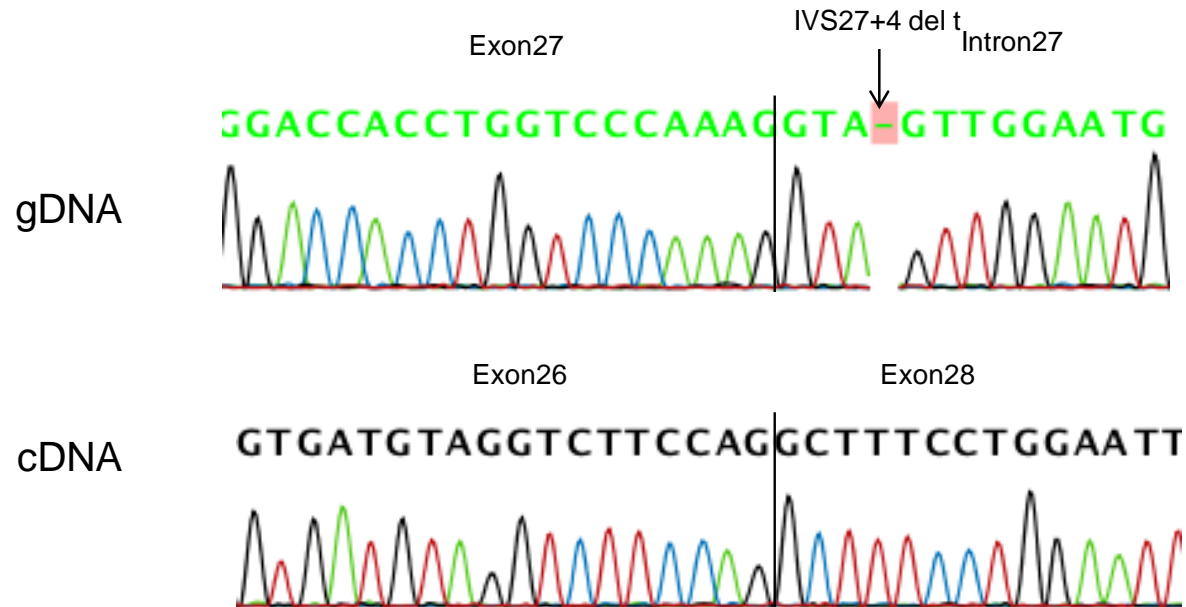

# K

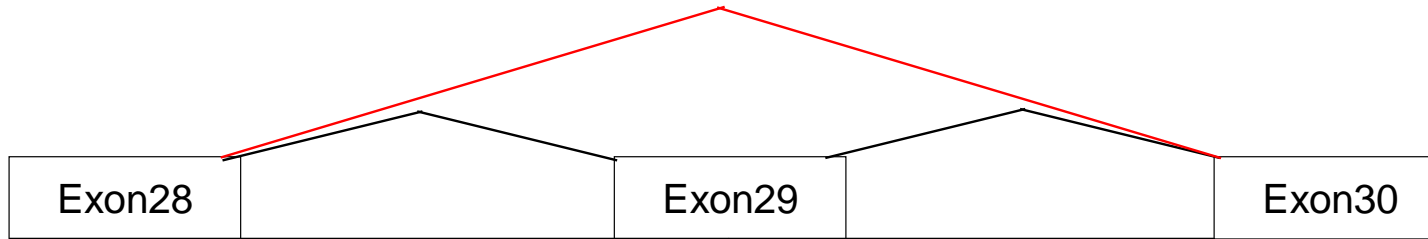

Normal: **GACCAAAG**gtatggaggctgtcactgcatctcaactt

original splice site

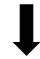

IVS12+5 g>a

Patient: g a c c a a a g g t a t a g g a g g c t g t c a c t g c a t c t c a a c t t

gDNA

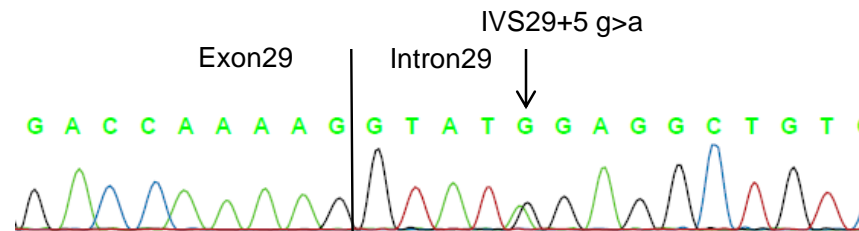

cDNA

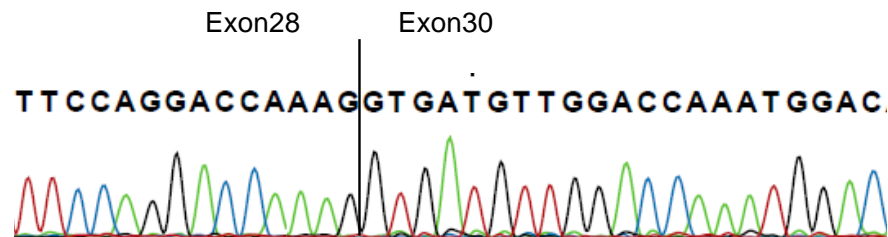

L

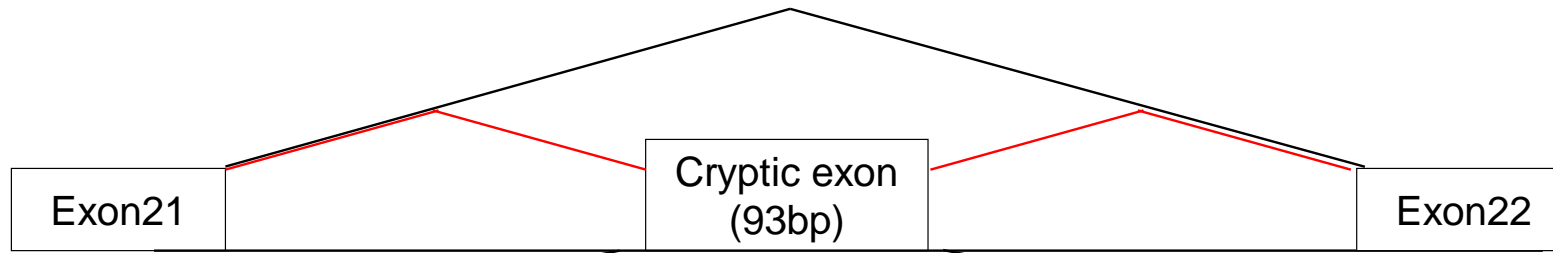

Normal:      ttttctgtag a g a t g g g g t t t c g      a g t g c t g g g a t t a c a g g c a t g a g c t a c t g

Patient:      ttttctgtag AGATGGGGTTTCG      AGTGCTGGGATTACAG g t a t g a g c t a c t g

new splice site

new splice site  
IVS21-367 c>t

IVS21-367 c>t

Intron21

**A T T A C A G G T A T G A G**

gDNA

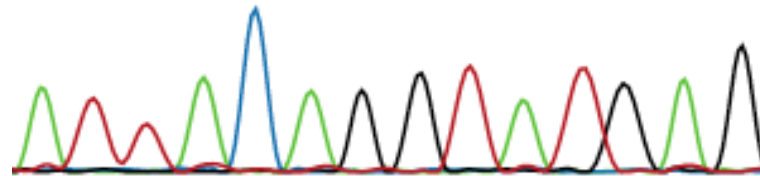

Cryptic exon

Exon22

**A T T A C A G G T G A C A A**

cDNA

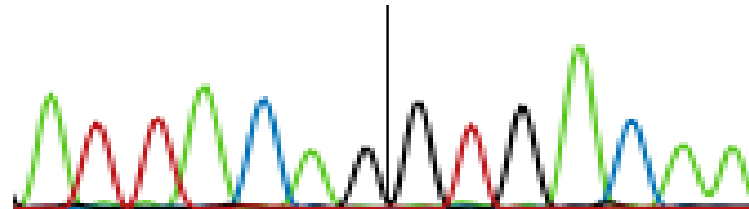

# M

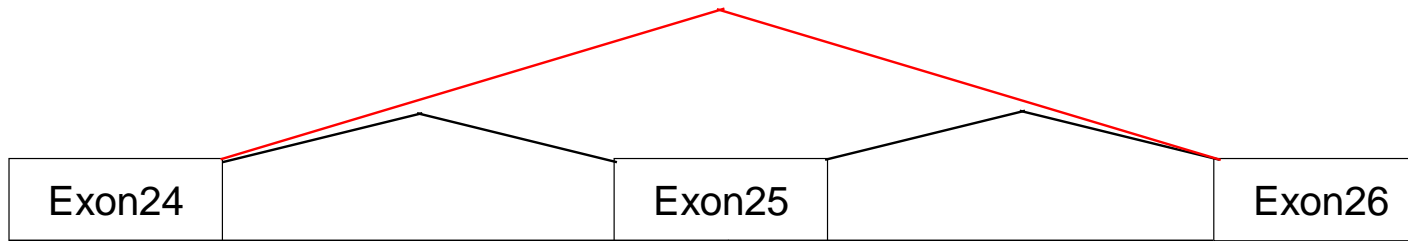

Normal: AGGCCAGCCAGGAATACCAGgtaagttactgtgtttgtt  
original splice site

Patient: aggccagccaggaataccatgtaagttactgtgtttgtt  
c.1948 g>t

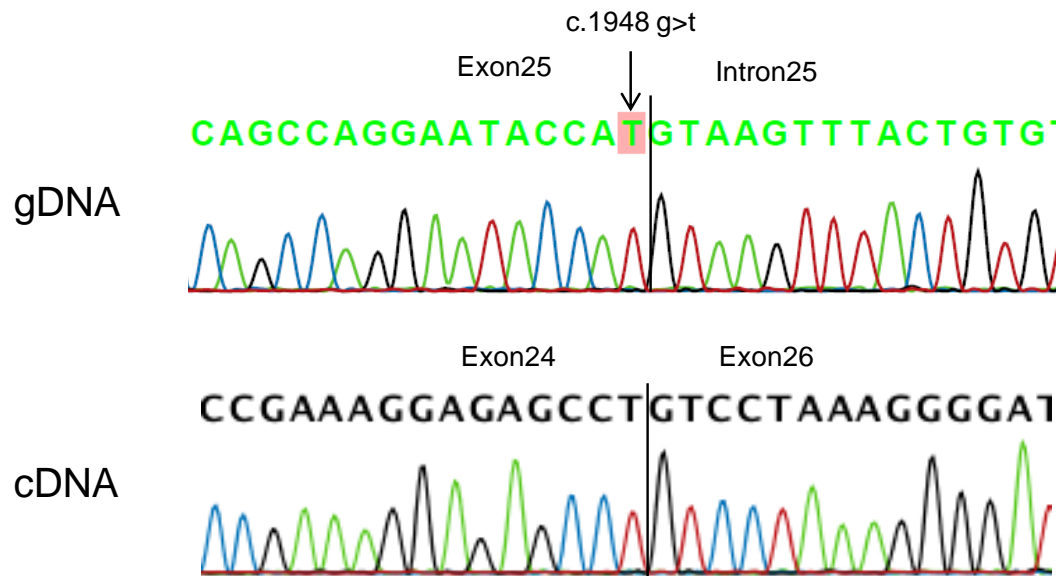

N

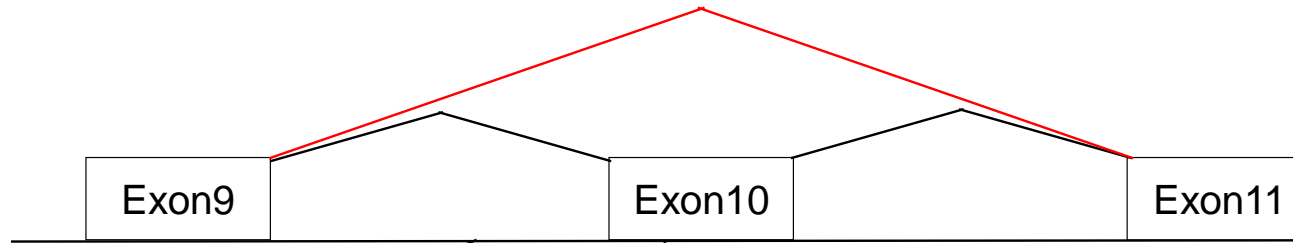

Normal: `ctcactttataacagGGCCTACCTGGTCC`

original splice site

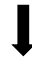

Patient: `ctcactttataacagg g g c c t a c c t g g t c c`

c.548 dup g

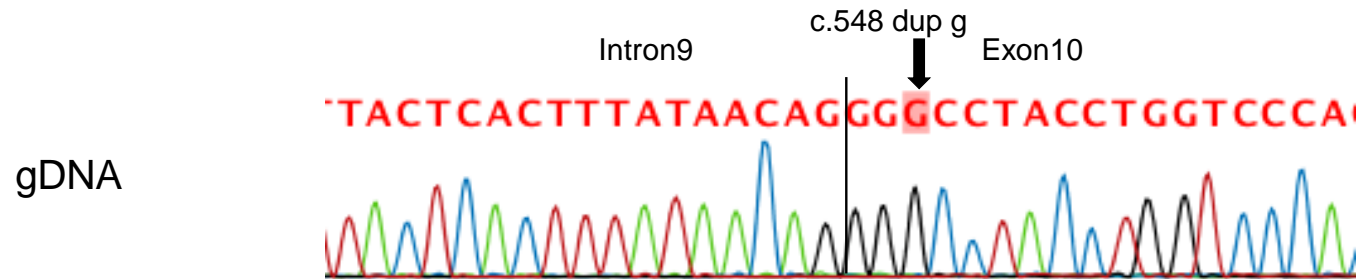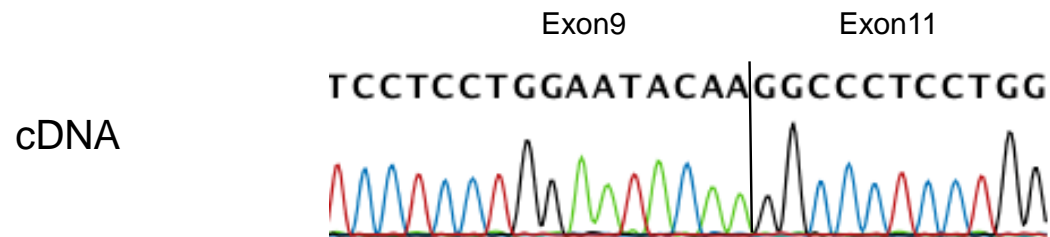

## Supplementary Figure legends

### sFigure. 1

a: Schematic for the hybrid minigene. The H492 vector contains two cassette exons, A and B, with a multiple cloning site including *NheI* and *BamHI* restriction sites. The H492 vector also contains a cytomegalovirus (CMV) enhancer-promotor and a bovine growth hormone gene (BGH) polyadenylation site. b: Electrophoresis and schematic for transcript analysis from the minigene constructs. Patients exhibited double bands (exon 10 skipping and exon 9+10 skipping) and wild-type exhibited triple bands. (full and exon 9 skipping and exon 9+10 skipping). Pt: patient; Wt: wild-type.

c: Direct sequencing for transcript analysis from the minigene constructs. Pt: patient; Wt: wild-type.

### sFigure. 2

Upper panels show schemas of aberrant splicing (red lines). Normal splicing is indicated by black lines. The original and new splice sites and flanking sequences are shown below. Patients' flanking genomic DNA and cDNA sequences are shown in the lower panels. (A) Patient ID A196. IVS23-1 G>A eliminated the splice acceptor site of intron 23 to activate a new splice site, one nucleotide downstream. (B) Patient ID A333. IVS49+1 G>A disrupted the splicing donor site of intron 49, resulting in an intron 49 insertion, which creates a transcript with a 345-bp insertion. (C) Patient ID A424. IVS 6-1 G>A altered the splice acceptor site of intron 6 one nucleotide downstream, which creates a transcript with a 1-bp deletion. (D) Patient ID A231, A258, A298. IVS35-4 A>G altered the splice acceptor site of intron 35 three nucleotides upstream, which creates a transcript with a 3-bp insertion. (E) Patient ID A247. IVS 12+5 G>A disrupted the splice donor site



of intron 12, resulting in exon 12 skipping, which creates a transcript with a 42-bp deletion. (F) Patient ID A299. IVS29+3 A>G disrupted the splice donor site of intron 29, resulting in exon 29 skipping, which creates a transcript with a 151-bp deletion. (G) Patient ID A323. IVS40-9 C>G altered the splice acceptor site of intron 40 nine nucleotides upstream, which creates a transcript with a 9-bp insertion. (H) Patient ID A371. IVS 18+3\_6 del AAGT disrupted the splice donor site of intron 18, resulting in exon 18 skipping, which creates a transcript with a 42-bp deletion. (I) Patient ID A384. IVS48-11A>G altered the splice acceptor site of intron 48 ten nucleotides upstream, which creates a transcript with a 10-bp insertion. (J) Patient ID A402. IVS27+4 del T disrupted the splice donor site of intron 27, resulting in exon 27 skipping, which creates a transcript with a 105-bp deletion. (K) Patients ID A452. IVS29+5 G>A disrupted the splice donor site of intron 29, resulting in exon 29 skipping, which creates a transcript with a 151-bp deletion. (L) Patient ID A329. IVS21-367 C>T produced a new splice donor site, resulting in a cryptic exon activation between exons 21 and 22 and creating a transcript with a 93-bp insertion. (M) Patient ID A375. Mutation in last nucleotide of exon 25, C1948 G>T, disrupted the splice donor site of intron 25, resulting in exon 25 skipping, which creates a transcript with a 169-bp deletion. (N) Patient ID A422. Mutation of the second nucleotide of exon 10, C548 dup G, disrupted the splicing acceptor site of intron 9, resulting in exon 10 skipping, which creates a transcript with a 63-bp deletion.
